# Supplementary material for: ADAM12 and ADAM17 are essential molecules for hypoxia-induced impairment of neural vascular barrier function
Source: PubMed Central journal article supplement (PMC4525292; doi:10.1038/srep12796), 2015-08-05
Supplement: srep12796-s1.pdf [file srep12796-s1.pdf]

## **Supplementary Information**

(Supplementary Figure S1, Supplementary Figure S2 and Supplementary Table S1)

### **ADAM12 and ADAM17 are essential molecules for hypoxia-induced impairment of neural vascular barrier function**

Dan Cui<sup>1</sup>, Mitsuru Arima<sup>1,2</sup>, Keiyo Takubo<sup>3,4</sup>, Tokuhiro Kimura<sup>1</sup>, Keisuke Horiuchi<sup>5</sup>, Takuya Minagawa<sup>6</sup>, Satoshi Matsuda<sup>7</sup>, Eiji Ikeda<sup>1</sup>

<sup>1</sup>Department of Pathology, Yamaguchi University Graduate School of Medicine, 1-1-1 Minami-Kogushi, Ube, Yamaguchi 755-8505, Japan; <sup>2</sup>Department of Ophthalmology, Kyushu University Graduate School of Medical Sciences, 3-1-1 Maidashi, Higashi-ku, Fukuoka City, Fukuoka 812-8582, Japan; <sup>3</sup>Department of Stem Cell Biology, Research Institute, National Center for Global Health and Medicine, 1-21-1 Toyama, Shinjuku-ku, Tokyo 162-8655, Japan; Departments of <sup>4</sup>Cell Differentiation, The Sakaguchi Laboratory of Developmental Biology, <sup>5</sup>Orthopedic Surgery and <sup>6</sup>Surgery, Keio University School of Medicine, 35 Shinanomachi, Shinjuku-ku, Tokyo 160-8582, Japan; <sup>7</sup>Department of Cell Signaling, Institute of Biomedical Sciences, Kansai Medical University, 10-15 Fumizono-cho, Moriguchi, Osaka 570-8506, Japan.

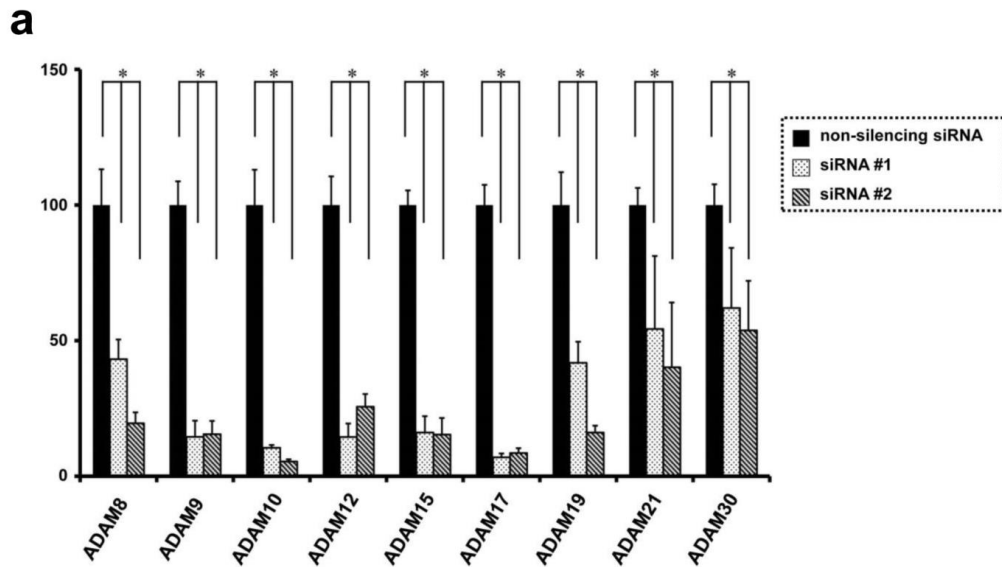

**b**

| Gene Name | siRNA ID | TaqMan Gene Expression Assays ID |
|-----------|----------|----------------------------------|
| Adam 8    | s61982   | Mm00545762_m1                    |
|           | s61983   |                                  |
| Adam 9    | s232235  | Mm01218460_m1                    |
|           | s232236  |                                  |
| Adam 10   | s61947   | Mm00545742_m1                    |
|           | s61945   |                                  |
| Adam 12   | s61951   | Mm00475719_m1                    |
|           | s61952   |                                  |
| Adam 15   | s61954   | Mm00477328_m1                    |
|           | s61955   |                                  |
| Adam 17   | s61959   | Mm00456428_m1                    |
|           | s61958   |                                  |
| Adam 19   | s61961   | Mm00477337_m1                    |
|           | s61962   |                                  |
| Adam 21   | s80809   | Mm00480375_s1                    |
|           | s80808   |                                  |
| Adam 30   | s89401   | Mm00810549_s1                    |
|           | s89401   |                                  |

Supplementary Figure S1: Silencing of ADAM family members with siRNAs.

a, Quantitative analysis of RNAs of targeted ADAM family members. Two kinds of siRNAs were designed for each member, and their significant silencing effects are presented. b, IDs of siRNAs and TaqMan Gene Expression Assays targeting ADAM family members. Information about these IDs can be obtained on the homepage of Applied Biosystems.

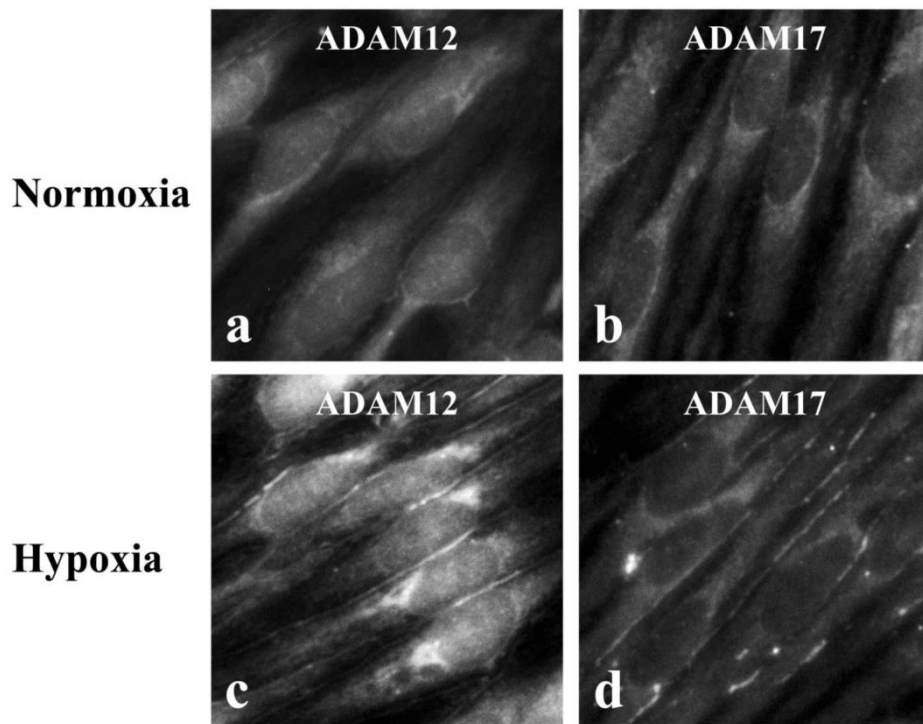

Supplementary Figure S2: Subcellular localization of ADAM12 and ADAM17 in endothelial cells under normoxia and hypoxia. Immunofluorescence images for the subcellular localization of ADAM12 (a, c) and ADAM17 (b, d) in bEnd.3 cells under normoxia (a, b) and hypoxia (c, d) are presented. Cell membrane-associated localization of ADAM12 as well as ADAM17 in bEnd.3 cells is enhanced under hypoxia. Specificities of fluorescence signals for ADAM12 and ADAM17 were confirmed by the abolishment of signals in cells pretreated with siRNAs for ADAM12 and ADAM17, respectively (data not shown).

**Supplementary Table S1 | Nucleotide sequences of primers for PCR**

|        |         | Primer sequence                  | Product size |
|--------|---------|----------------------------------|--------------|
| ADAM8  | Forward | 5' -TTGCCCATGTGAAACAGTA-3'       | 408 bp       |
|        | Reverse | 5' -GATGTTTGCCCTGATACATCGC-3'    |              |
| ADAM9  | Forward | 5' -TTGCTCATGAATGGGGCATAAC-3'    | 425 bp       |
|        | Reverse | 5' -CAGTACTCAGGAACATCACA-3'      |              |
| ADAM10 | Forward | 5' -CCATCAACTTGTCCAGTAC-3'       | 421 bp       |
|        | Reverse | 5' -CCCATTTGATAACTCTCTCG-3'      |              |
| ADAM12 | Forward | 5' -CTTGACTGTAGGAATCCTGG-3'      | 494 bp       |
|        | Reverse | 5' -CTCACCAAGGCACTAGTGAG-3'      |              |
| ADAM15 | Forward | 5' -GGAGAGCAGTGTGACTGTGGC-3'     | 186 bp       |
|        | Reverse | 5' -GCAGAACTCAGGCAGATCACA-3'     |              |
| ADAM17 | Forward | 5' -CACTTTTGGGAAGTTTCTGG-3'      | 492 bp       |
|        | Reverse | 5' -CTCTGTCTCTTTGCTGTCAAC-3'     |              |
| ADAM19 | Forward | 5' -GGCTGGTGATGACTGGAA-3'        | 429 bp       |
|        | Reverse | 5' -GCTTGAAAGTTGGGTTGG-3'        |              |
| ADAM20 | Forward | 5' -CTGATAGAGCATTCTACAGTGC-3'    | 608 bp       |
|        | Reverse | 5' -TGCTGTGATAGCTAATGCTT-3'      |              |
| ADAM21 | Forward | 5' -TCTGGCTTGGGGTATTTTGG-3'      | 500 bp       |
|        | Reverse | 5' -TTGGCGTGCTACTTCCTTCT-3'      |              |
| ADAM28 | Forward | 5' -GATGGGATGGTTCAAGAACC-3'      | 644 bp       |
|        | Reverse | 5' -TGGTCCTGAACAATGCCAAC-3'      |              |
| ADAM30 | Forward | 5' -AACCAGGTGCCAACTGTAGC-3'      | 496 bp       |
|        | Reverse | 5' -CCCATGGGTTTCATGGATAG-3'      |              |
| ADAM33 | Forward | 5' -CTGAGAACTCTCATGAGC-3'        | 540 bp       |
|        | Reverse | 5' -GACTCAGTCGAACCATAG-3'        |              |
| GAPDH  | Forward | 5' -TGAAGGTCGGAGTCAACGGATTGGT-3' | 930 bp       |
|        | Reverse | 5' -CATGTGGCCATGCGGTCCACCAC-3'   |              |
